# Supplementary material for: Solution-processable conjugated polymers containing alternating 1-alkyl-1,2,4-triazole and NSN links
Source: Royal Society of Chemistry journal article supplement (doi:10.1039/c0jm00254b), 2010-01-01
Supplement: c0jm00254b.pdf [file c0jm00254b.pdf]

## **Supporting Information**

### **Solution-processable conjugated polymers containing alternating 1-alkyl-1,2,4-triazole and N=S=N Links**

Mingfeng Wang, Fred Wudl\*

*Department of Chemistry and Biochemistry, Center for Polymers and Organic Solids, Mitsubishi Chemical Center for Advanced Materials and Materials Research Laboratory, University of California, Santa Barbara, CA 93106-6105*

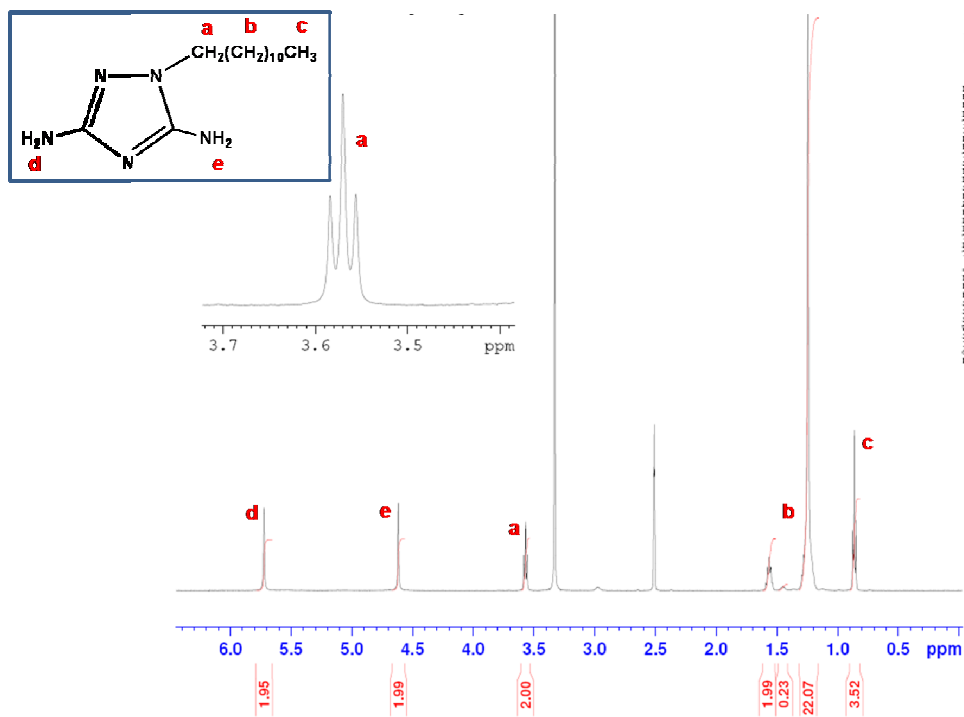

**Figure S1.** <sup>1</sup>H-NMR (DMSO-d<sub>6</sub>) of DDTA.

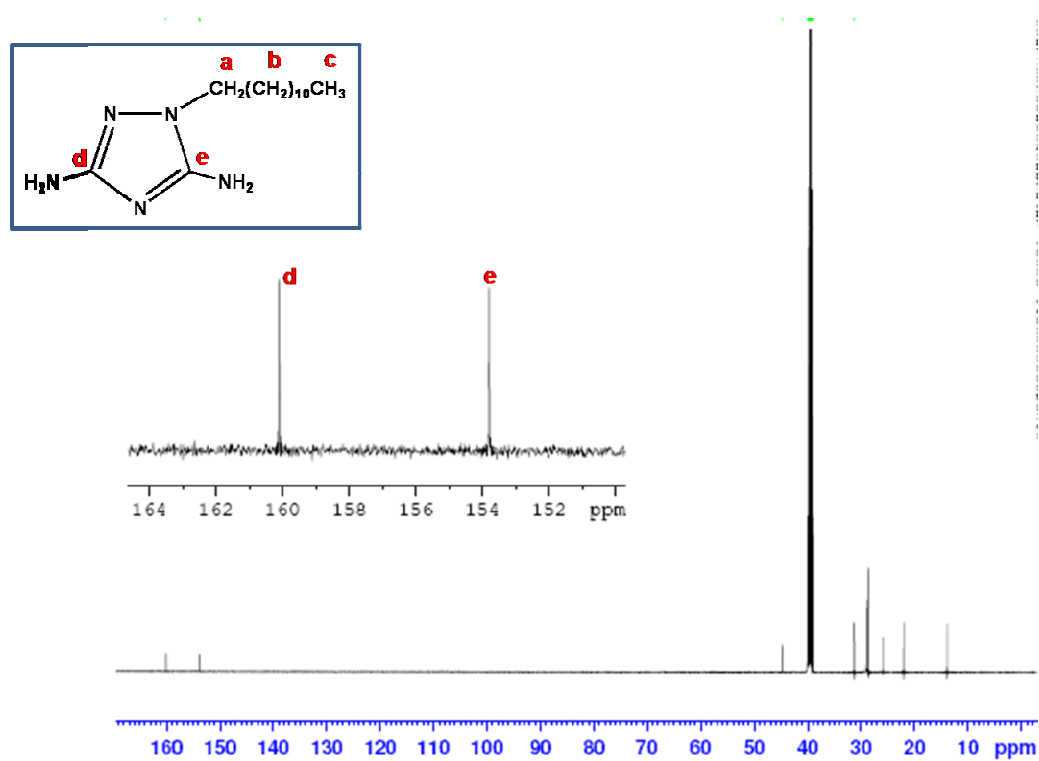

Figure S2.  $^{13}\text{C}$ -NMR ( $\text{DMSO-d}_6$ ) of DDTA.

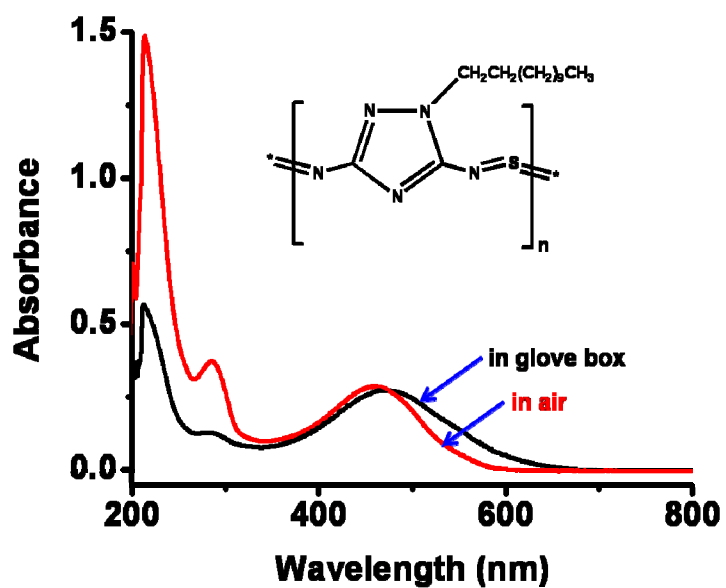

**Figure S3.** UV-vis absorption spectra of PBSDDT-1 in THF prepared under different conditions. This polymer was synthesized from the polymerization of BSDDT-1 that was prepared by using N-sulfinyl-p-toluenesulfonamide as the sulfinylating agent. DMAP was used as the catalyst for the polymerization.

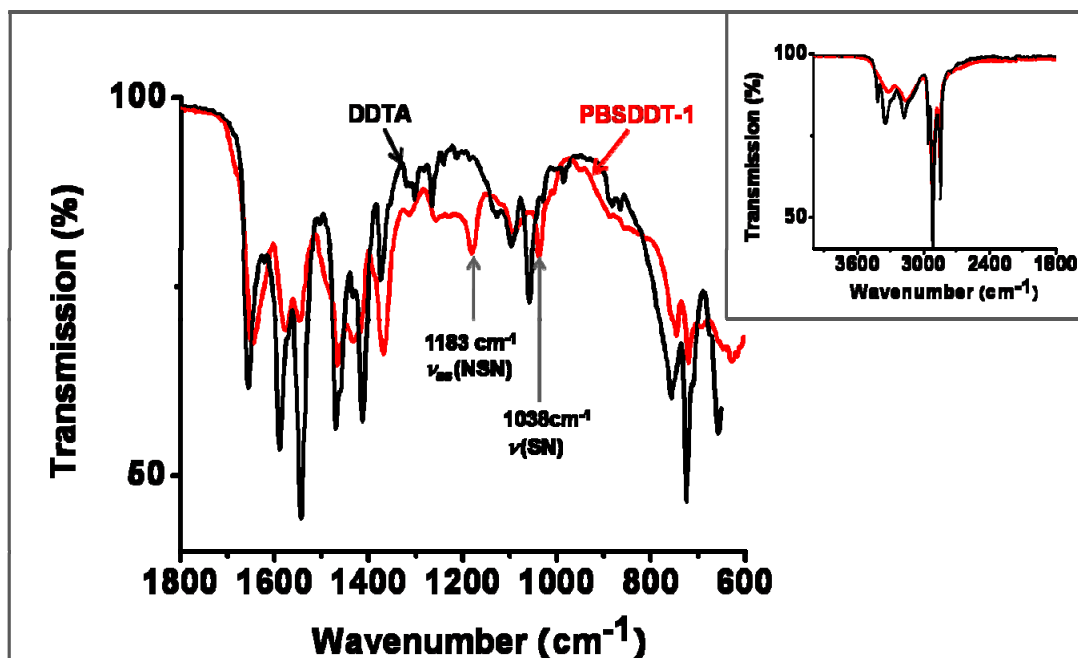

**Figure S4.** FTIR spectra of DDTA-1 and PBSDDT-1 that was purified twice by precipitation in CH<sub>3</sub>CN. This polymer was synthesized from the polymerization of BSDDT that was prepared by using N-sulfinyl-p-toluenesulfonamide as the sulfinylating agent. DMAP was used as the catalyst for the polymerization. The polymer product was purified twice by precipitation in CH<sub>3</sub>CN.

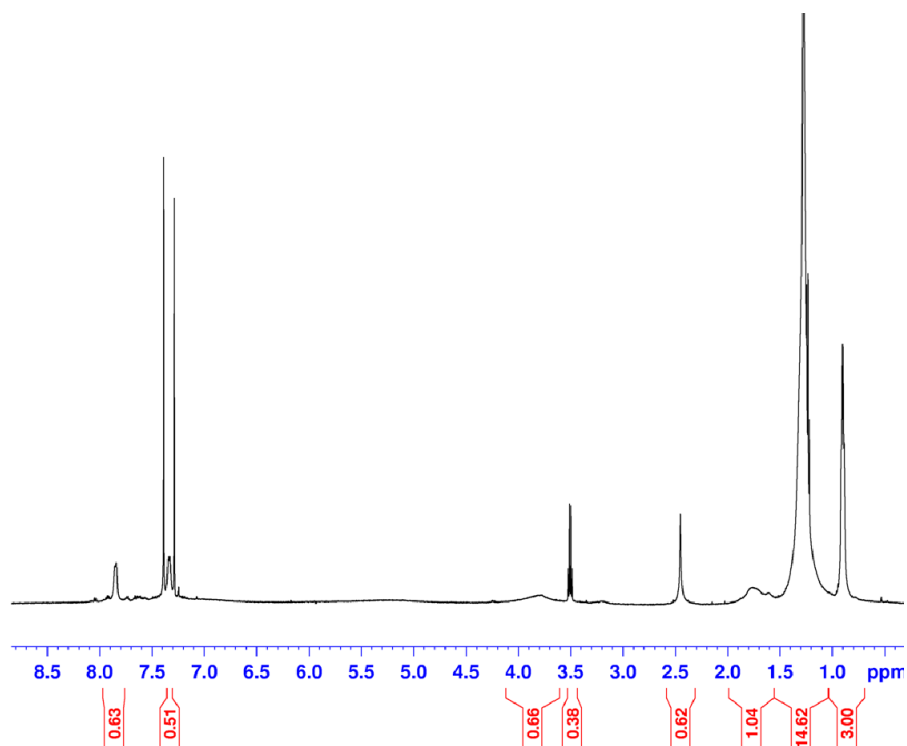

**Figure S5.** <sup>1</sup>H-NMR (CDCl<sub>3</sub>) of PBSDDT-2. This polymer was synthesized from the polymerization of BSDDT-1 that was prepared by using N-sulfinyl-p-toluenesulfonamide as the sulfinylating agent. AlCl<sub>3</sub> was used as the catalyst for the polymerization.

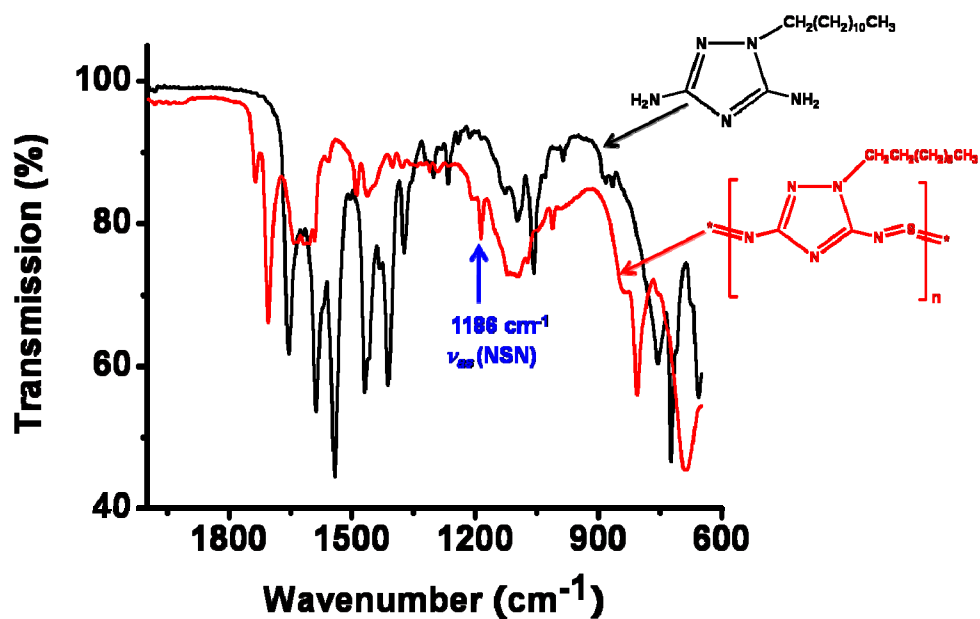

**Figure S6.** FTIR spectra of DDTA and PBSDDT-2. This polymer was synthesized from the polymerization of BSDDT-1 that was prepared by using N-sulfinyl-p-toluenesulfonamide as the sulfinylating agent. AlCl<sub>3</sub> was used as the catalyst for the polymerization.
